# Supplementary material for: Enhanced plasmon-driven photoelectrocatalytic methanol oxidation on Au decorated α-Fe2O3 nanotube arrays
Source: Royal Society of Chemistry journal article supplement (doi:10.1039/c8cc04199g), 2018-01-01
Supplement: c8cc04199g1.pdf [file c8cc04199g1.pdf]

## Supporting Information

### Enhanced plasmon-driven photoelectrocatalytic methanol oxidation on Au decorated $\alpha$ -Fe<sub>2</sub>O<sub>3</sub> nanotube arrays

Bang-Feng Zheng,<sup>a,b,#</sup> Ting Ouyang,<sup>b,#</sup> Zhu Wang<sup>a,b</sup>, Jianyou Long<sup>a,\*</sup>, Yibo Chen<sup>b</sup>,  
Zhao-Qing Liu<sup>b,\*</sup>

<sup>a</sup>School of Environmental Science and Engineering, Guangzhou University,  
Guangzhou Higher Education Mega Center, Outer Ring Road No. 230, 510006, P. R.  
China. Email: [longjianyou@gzhu.edu.cn](mailto:longjianyou@gzhu.edu.cn)

<sup>b</sup>School of Chemistry and Chemical Engineering/Key Laboratory for Water Quality  
and Conservation of the Pearl River Delta, Ministry of Education, Guangzhou  
University, Guangzhou Higher Education Mega Center, Outer Ring Road No. 230,  
510006, P. R. China. Email: [lzqgz@gzhu.edu.cn](mailto:lzqgz@gzhu.edu.cn)

<sup>#</sup>These authors contribute equally to this work.

# Figure contents of Supporting Information

|                                                                                                                                                                                                                                                                                                                                                             |    |
|-------------------------------------------------------------------------------------------------------------------------------------------------------------------------------------------------------------------------------------------------------------------------------------------------------------------------------------------------------------|----|
| <b>Experimental Section</b> .....                                                                                                                                                                                                                                                                                                                           | 3  |
| Sample preparation .....                                                                                                                                                                                                                                                                                                                                    | 3  |
| Photoelectrochemical Measurements .....                                                                                                                                                                                                                                                                                                                     | 4  |
| Formaldehyde detection .....                                                                                                                                                                                                                                                                                                                                | 4  |
| Photoelectrochemical testing .....                                                                                                                                                                                                                                                                                                                          | 5  |
| <b>Supplementary Figures</b> .....                                                                                                                                                                                                                                                                                                                          | 6  |
| Fig. S1 SEM images of the a), b) ZnO NRAs; c), d) $\alpha$ -Fe <sub>2</sub> O <sub>3</sub> /ZnO NTAs.....                                                                                                                                                                                                                                                   | 6  |
| Fig. S2 SAED pattern of ZnO/ $\alpha$ -Fe <sub>2</sub> O <sub>3</sub> /Au NTAs.....                                                                                                                                                                                                                                                                         | 7  |
| Fig. S3 XRD pattern of ZnO NRAs, ZnO/ $\alpha$ -Fe <sub>2</sub> O <sub>3</sub> NTAs and ZnO/ $\alpha$ -Fe <sub>2</sub> O <sub>3</sub> /Au NTAs.....                                                                                                                                                                                                         | 8  |
| Fig. S4 XPS survey spectrum of ZnO/ $\alpha$ -Fe <sub>2</sub> O <sub>3</sub> /Au NTAs.....                                                                                                                                                                                                                                                                  | 9  |
| Fig. S5 UV-vis diffuse spectra of ZnO NRAs, $\alpha$ -Fe <sub>2</sub> O <sub>3</sub> /ZnO NTAs and Au/ $\alpha$ -Fe <sub>2</sub> O <sub>3</sub> /ZnO NTAs.....                                                                                                                                                                                              | 10 |
| Fig. S6 Transient photocurrents of ZnO, ZnO/ $\alpha$ -Fe <sub>2</sub> O <sub>3</sub> and ZnO/ $\alpha$ -Fe <sub>2</sub> O <sub>3</sub> /Au.....                                                                                                                                                                                                            | 11 |
| Fig. S7 EIS of ZnO NRAs, ZnO/ $\alpha$ -Fe <sub>2</sub> O <sub>3</sub> NTAs and ZnO/ $\alpha$ -Fe <sub>2</sub> O <sub>3</sub> /Au NTAs. ....                                                                                                                                                                                                                | 12 |
| Fig. S8 Formaldehyde evolution calculated from the bulk electrolysis (line) and quantified from the calibration curve (circles) of ZnO NRAs, ZnO/ $\alpha$ -Fe <sub>2</sub> O <sub>3</sub> NTAs and ZnO/ $\alpha$ -Fe <sub>2</sub> O <sub>3</sub> /Au NTAs under full light .....                                                                           | 13 |
| Fig. S9 Formaldehyde evolution calculated from the bulk electrolysis (line) and quantified from the calibration curve (circles) of ZnO/ $\alpha$ -Fe <sub>2</sub> O <sub>3</sub> /Au NTAs under visible light ( $\lambda \geq 420$ nm) .....                                                                                                                | 14 |
| Fig. S10 CH <sub>2</sub> O calibration curve, prepared following the reported procedure. ....                                                                                                                                                                                                                                                               | 15 |
| Fig. S11 Current/potential response of the measured photoanodes under full light. (a) ZnO, (b) ZnO/ $\alpha$ -Fe <sub>2</sub> O <sub>3</sub> and (c) ZnO/ $\alpha$ -Fe <sub>2</sub> O <sub>3</sub> /Au photoanodes were measured in 0.1 M NaOH aqueous solution (violet) and 25% methanol (orange), 50% methanol (blue), 75% methanol (green) and 95%. .... | 16 |
| <b>References</b> .....                                                                                                                                                                                                                                                                                                                                     | 17 |

## Experimental Section

### Sample preparation

The preparation of ZnO NRAs: ZnO NRAs grew on FTO substrate by chemical bath deposition (CBD). ZnO NRAs were grown on a clean fluorine tin oxide (FTO) substrate in a two-electrode system with an 500 mL aqueous solution including 2.98 g  $\text{Zn}(\text{NO}_3)_2$ , 0.39 g  $\text{NH}_4\text{Ac}$  and 0.70 g HMT in 90 °C, the deposition time was 50 min, and deposition current was fixed at -2 mA.<sup>1</sup>

The preparation of ZnO/ $\alpha$ - $\text{Fe}_2\text{O}_3$  NTAs: ZnO/ $\alpha$ - $\text{Fe}_2\text{O}_3$  NTAs were synthesized by typical “sacrificial template-accelerated hydrolysis” (STAH) approach, which is essential to initiating the ZnO/ $\alpha$ - $\text{Fe}_2\text{O}_3$  nanotube formation. The as-synthesized ZnO NRAs were placed into a 100 mL 0.1 M  $\text{Fe}(\text{NO}_3)_3 \cdot 9\text{H}_2\text{O}$  aqueous solution and kept at 25 °C for 1 h. The ZnO NRAs were partially dissolved in turn accelerates  $\text{Fe}^{3+}$  hydrolysis. Then the sample was dried and treated at 450 °C in air for 5h to ensure sufficient oxidation of  $\text{Fe}_2\text{O}_3$  obtained ZnO/ $\alpha$ - $\text{Fe}_2\text{O}_3$  NTAs.<sup>2</sup>

The preparation of ZnO/ $\alpha$ - $\text{Fe}_2\text{O}_3$ /Au NTAs: The Au nanoparticles were reduced and then uniformly decorated on sequential ZnO/ $\alpha$ - $\text{Fe}_2\text{O}_3$  NTAs. The as-synthesized ZnO/ $\alpha$ - $\text{Fe}_2\text{O}_3$  NTAs were immersed into 100mL aqueous solution containing 3 mL  $\text{HAuCl}_4$ , 0.025 g  $\text{C}_6\text{H}_5\text{Na}_3\text{O}_7 \cdot 2\text{H}_2\text{O}$ , and 0.02 g  $\text{NaBH}_4$  for 1 h to load Au particles, then the sample was dried at 25 °C in air for 5 h to obtain ZnO/ $\alpha$ - $\text{Fe}_2\text{O}_3$ /Au NTAs.<sup>3</sup>

### Physicochemical Characterizations

The surface morphology and detailed microscopic structure of samples were analyzed using field emission scanning electron microscopy (FESEM, JSM-6701F) and transmission electron microscopy equipped (TEM, JEM2010-HR). The crystal phase of the samples were characterized by powder X-ray diffraction (XRD, Bruker, D8 Advance) with  $\text{K}\alpha$  irradiation ( $\lambda = 0.15418$  nm). The chemical-state analysis of the products was measured with X-ray photoelectron spectroscopy (XPS, Thermo K-Alpha). The UV-vis diffuse reflectance spectra (UV-vis DRS) of the samples were obtained using a UV-vis spectrophotometer (Cary 300). The absorbance of samples was measured by UV-vis spectrophotometer (Shimadzu UVmini-1240).

## Photoelectrochemical Measurements

The photoelectrochemical performances of the obtained catalysts were measured by electrochemical workstation (CHI 760D, China Chenhua) in a cubical complete quartz cell with a three-electrode system. The as-prepared photoanodes as the working electrode, Ag/AgCl electrode (saturated KCl solution) and Pt sheet served as the reference electrode and counter electrode, respectively. The light source is adjustable 350W Xe lamp for simulated sunlight, and the monochromators (AnHe, Inc., China) were used with Xe lamp for incident photon to current conversion efficiency (IPCE) measurement.

## Formaldehyde detection

First of all, the calibration curve was received by concentration gradients from 0 to 0.5 ppm (Fig. S7), and then the aqueous solution mingled with KOH, 4-Amino-3-hydrazino-5-mercapto-1, 2, 4-triazole (AHMT, which was used as colorant) and  $\text{KIO}_4$ , stirring fully and then standing 10 minutes for coloring. Methanol were oxidated to formaldehyde in a three-electrode quartz cell (50 mL electrolyte solution contained 95%  $\text{CH}_3\text{OH}$  in 0.10 M NaOH) under full light at 0.80 V vs. Ag/AgCl. To quantify formaldehyde, five aliquots were extracted at the following times of reaction 0, 15, 30, 45 and 60 min. The extracted 0.1 mL electrolyte was mixed with 4.2 mL of 5 M KOH, 0.50% AHMT and 1.5%  $\text{KIO}_4$  in  $\text{H}_2\text{O}$ , according to the reported procedure. The UV-vis absorption spectrums of the final mixtures were then measured at 549 nm by UV-vis spectrophotometer.<sup>4,5</sup>

The Faradaic efficiency (FE) was estimated using the following equation:<sup>5</sup>

$$PE = \frac{\text{mol of detected } \text{CH}_2\text{O}}{\text{mol of } \text{CH}_2\text{O} \text{ calculated from the bulk electrolysis}} \times 100$$

It is a potential method for photoelectrochemical formaldehyde synthesis. Under the action of  $h^+$ , methanol can be oxidate due to the following reaction:<sup>5</sup>

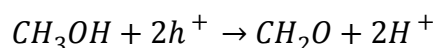

where  $h^+$  represents a photohole on the photoanode. It is a potential route for

photoelectrochemical oxidation of methanol.

### **Photoelectrochemical testing**

The carrier density of the electrodes can be calculated from the following equation:

$$N = (2/\epsilon\epsilon_0e_0)[d(1/C^2)/dV]^{-1}$$

Where  $\epsilon$  denotes the dielectric constant of the semiconductor,  $\epsilon_0$  denotes the permittivity of a vacuum ( $8.85 \times 10^{-12} \text{ Fm}^{-1}$ ),  $e_0$  denotes the electronic charge unit ( $1.60 \times 10^{-19} \text{ C}$ ), and  $V$  denotes the potential applied at the electrode.

The incident photon to current conversion efficiency (IPCE) measurement is further performed to quantify the photoelectric conversion efficiency of photoanodes under various incident light wavelengths according to the following formula:

$$IPCE = 1240J / \lambda J_{light}$$

where  $J$  is the measured photocurrent density at the specific wavelength ( $\text{mA cm}^{-2}$ ),  $\lambda$  is the incident light wavelength, and  $J_{light}$  is measured irradiance at the specific wavelength ( $\text{mW cm}^{-2}$ ).

## Supplementary Figures

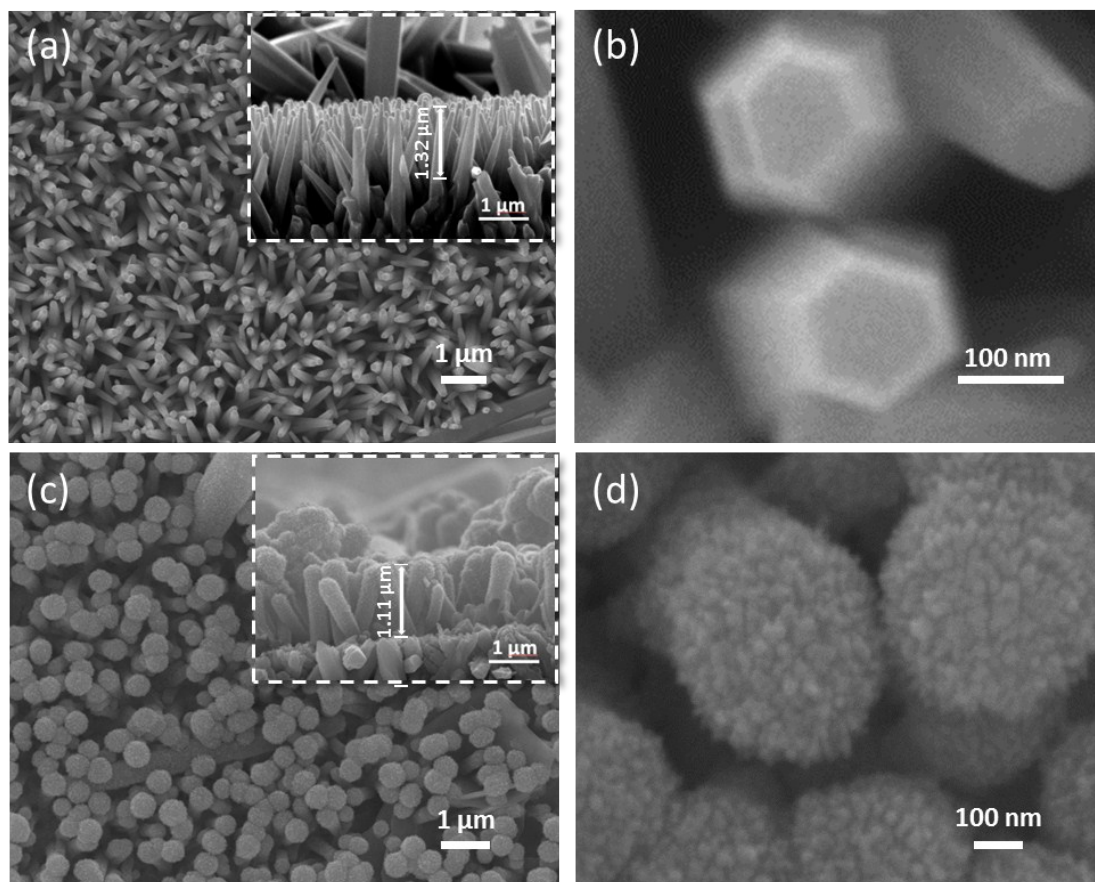

**Fig. S1** SEM images of the a), b) ZnO NRAs; c), d)  $\alpha$ -Fe<sub>2</sub>O<sub>3</sub>/ZnO NTAs.

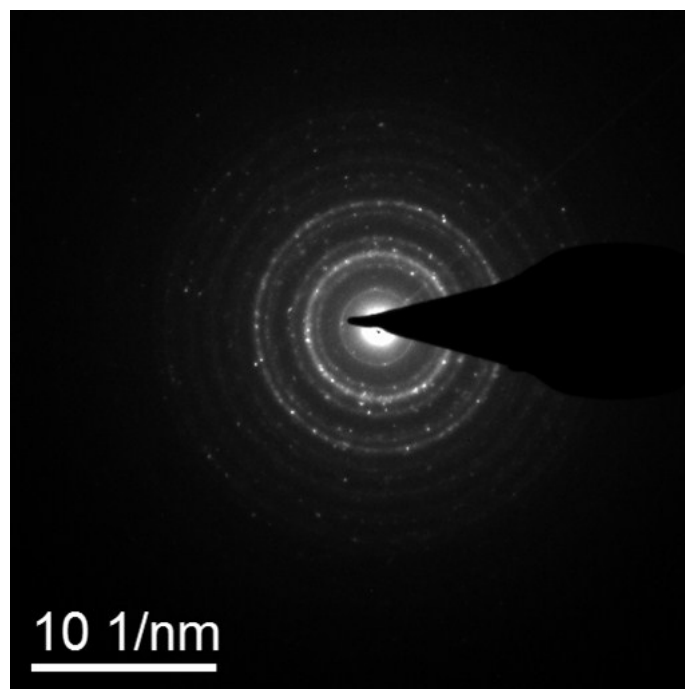

**Fig. S2** SAED pattern of ZnO/ $\alpha$ -Fe<sub>2</sub>O<sub>3</sub>/Au NTAs.

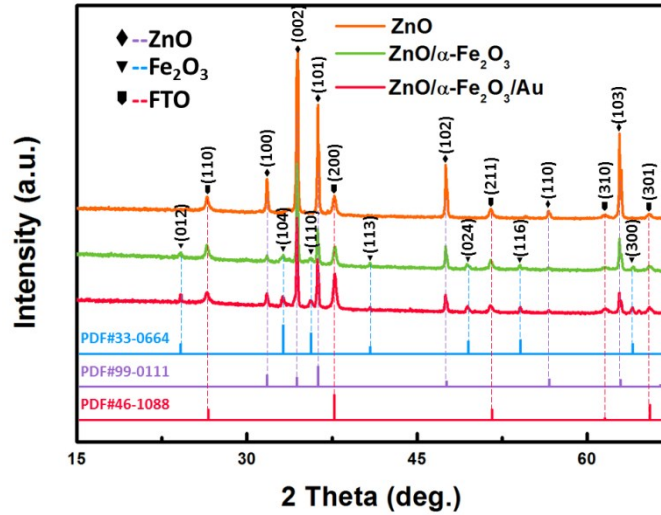

**Fig. S3** XRD pattern of ZnO NRAs, ZnO/ $\alpha$ -Fe<sub>2</sub>O<sub>3</sub> NTAs and ZnO/ $\alpha$ -Fe<sub>2</sub>O<sub>3</sub>/Au NTAs.

Distinct diffraction peaks at  $31.77^\circ$ ,  $34.42^\circ$ ,  $36.25^\circ$ ,  $47.54^\circ$ ,  $56.59^\circ$  and  $62.85^\circ$  correspond to (100), (002), (101), (102), (110) and (103) planes of ZnO (JCPDS:99-0111), which indicated that the as-prepared ZnO NRAs has high crystallinity. And the relatively impotent diffraction peaks at  $24.14^\circ$ ,  $33.15^\circ$ ,  $35.61^\circ$ ,  $40.85^\circ$ ,  $49.48^\circ$ ,  $54.09^\circ$  and  $63.99^\circ$  correspond to (012), (104), (110), (113), (024), (116) and (300) planes of  $\alpha$ -Fe<sub>2</sub>O<sub>3</sub> (JCPDS:33-0664).



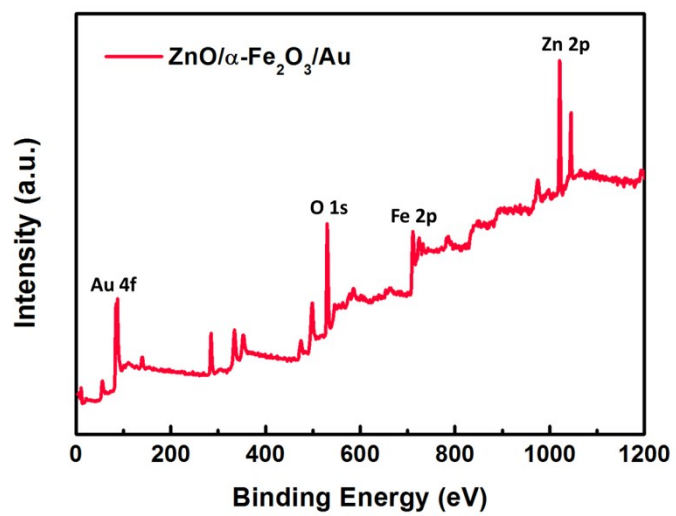

**Fig. S4** XPS survey spectrum of ZnO/ $\alpha$ -Fe<sub>2</sub>O<sub>3</sub>/Au NTAs.

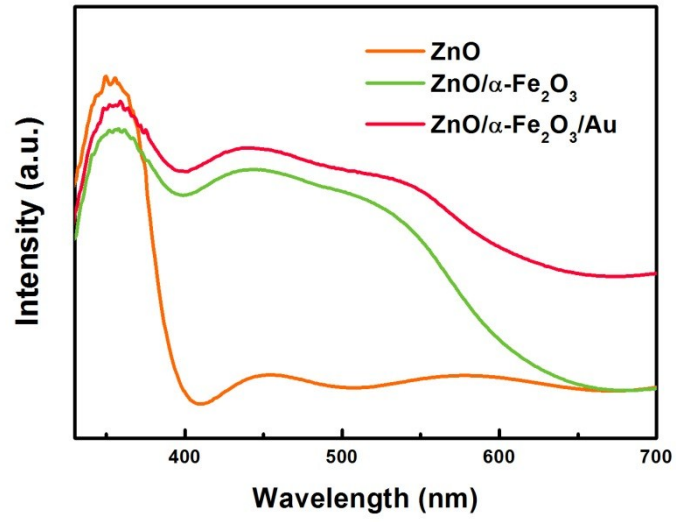

**Fig. S5** UV-vis diffuse spectra of ZnO NRAs,  $\alpha$ -Fe<sub>2</sub>O<sub>3</sub>/ZnO NTAs and Au/ $\alpha$ -Fe<sub>2</sub>O<sub>3</sub>/ZnO NTAs.

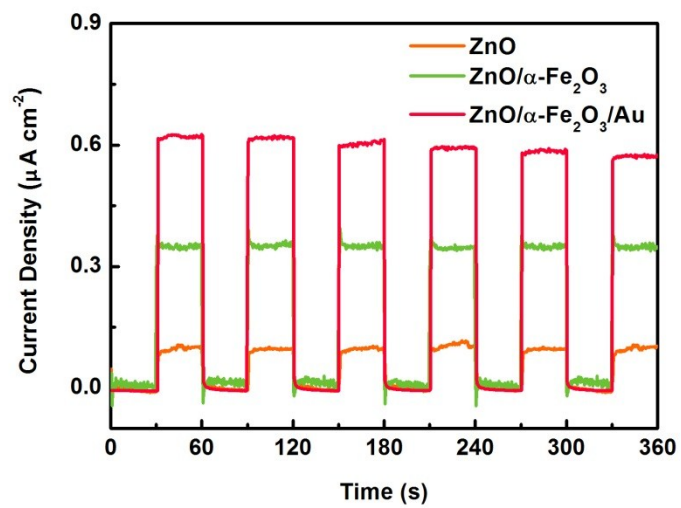

**Fig. S6** Transient photocurrents of ZnO, ZnO/ $\alpha\text{-Fe}_2\text{O}_3$  and ZnO/ $\alpha\text{-Fe}_2\text{O}_3$ /Au.

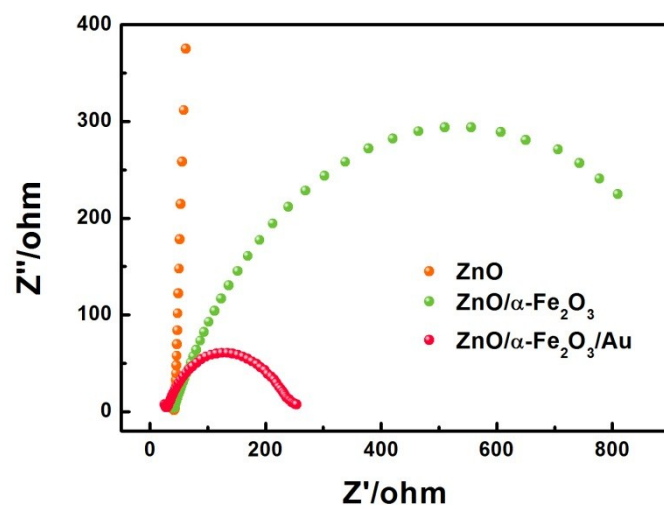

**Fig. S7** EIS of ZnO NRAs, ZnO/ $\alpha$ -Fe<sub>2</sub>O<sub>3</sub> NTAs and ZnO/ $\alpha$ -Fe<sub>2</sub>O<sub>3</sub>/Au NTAs.

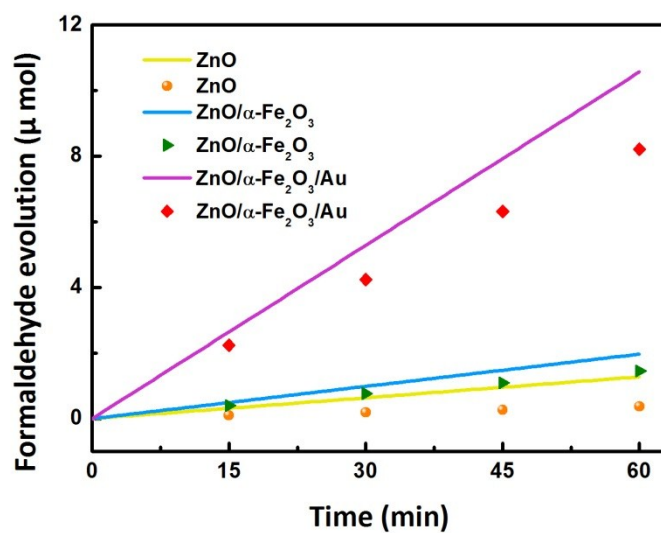

**Fig. S8** Formaldehyde evolution calculated from the bulk electrolysis (line) and quantified from the calibration curve (circles) of ZnO NRAs, ZnO/ $\alpha$ -Fe<sub>2</sub>O<sub>3</sub> NTAs and ZnO/ $\alpha$ -Fe<sub>2</sub>O<sub>3</sub>/Au NTAs under full light.

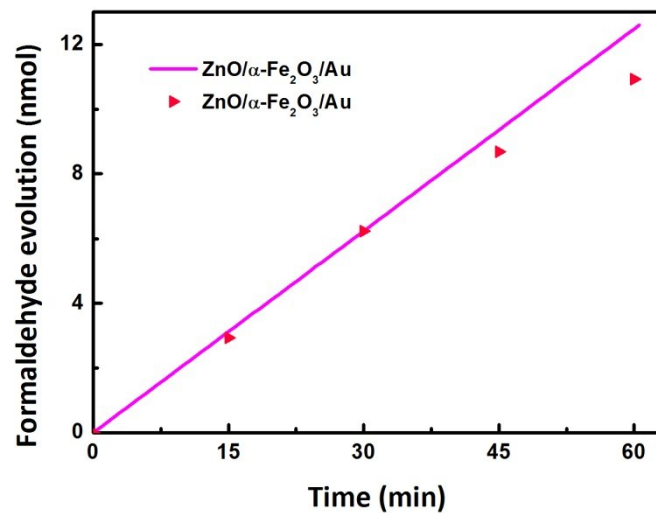

**Fig. S9** Formaldehyde evolution calculated from the bulk electrolysis (line) and quantified from the calibration curve (circles) of ZnO/ $\alpha$ -Fe<sub>2</sub>O<sub>3</sub>/Au NTAs under visible light ( $\lambda \geq 420$  nm).

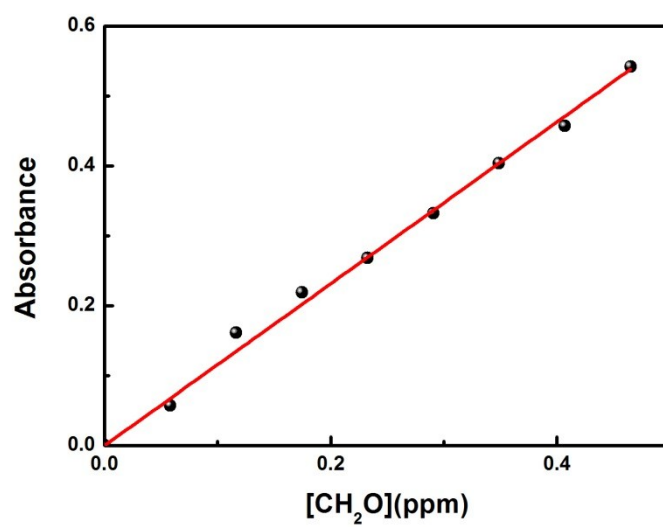

**Fig. S10** CH<sub>2</sub>O calibration curve, prepared following the reported procedure.

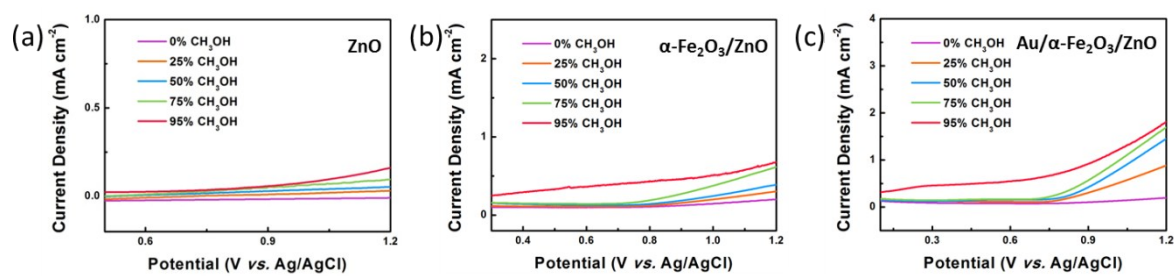

**Fig. S11** Current/potential response of the measured photoanodes under full light. (a) ZnO, (b) ZnO/ $\alpha$ -Fe<sub>2</sub>O<sub>3</sub> and (c) ZnO/ $\alpha$ -Fe<sub>2</sub>O<sub>3</sub>/Au photoanodes were measured in 0.1 M NaOH aqueous solution (violet) and 25% methanol (orange), 50% methanol (blue), 75% methanol (green) and 95%.



## References

1. R.-B. Wei, P.-Y. Kuang, H. Cheng, Y.-B. Chen, J.-Y. Long, M.-Y. Zhang and Z.-Q. Liu, *ACS Sustainable Chem. Eng.*, 2017, **5**, 4249-4257.
2. J. Liu, Y. Li, H. Fan, Z. Zhu, J. Jiang, R. Ding, Y. Hu and X. Huang, *Chem. Mater.*, 2010, **22**, 212-217.
3. P. Y. Kuang, P. X. Zheng, Z. Q. Liu, J. L. Lei, H. Wu, N. Li and T. Y. Ma, *small*, 2016, **12**, 6735-6744.
4. N. W. J. a. R. G. Dickinson, *Anal. Chem.*, 1974, **46**, 298.
5. C. A. Mesa, A. Kafizas, L. Francas, S. R. Pendlebury, E. Pastor, Y. Ma, F. Le Formal, M. T. Mayer, M. Gratzel and J. R. Durrant, *J. Am. Chem. Soc.*, 2017, **139**, 11537-11543.
